# Supplementary material for: Survey of Colistin Resistance in Commensal Bacteria from Penaeus vannamei Farms in China
Source: MDPI journal article supplement (doi:10.3390/foods12112143), 2023-05-26
Supplement: s1 [file s1]

## Supplementary Data

### Survey of colistin resistance in commensal bacteria from *Penaeus vannamei* farms in China

Yilin Zhang<sup>1</sup>, Xinrui Lv<sup>1</sup>, Weiwei Cao<sup>2</sup>, Huang Zhang<sup>3</sup>, Lei Shi<sup>1,4</sup>, Weibin Bai<sup>1</sup> and Lei Ye<sup>1,\*</sup>

<sup>1</sup> Institute of Food Safety and Nutrition, Jinan University, Guangzhou 510632, China; stzhyl@163.com (Y.Z.); lxrui\_1995@163.com (X.L.); shilei@jnu.edu.cn (L.S.); baiweibin@163.com (W.B.)

<sup>2</sup> School of Food Science and Biology, Guangdong Polytechnic of Science and Trade, Guangzhou 510640, China; weiwei09201029@163.com

<sup>3</sup> Guangzhou Double Helix Gene Technology Co., Ltd., Guangzhou International Bio Island Co., Ltd., Guangzhou 510320, China; 18680288520@163.com

<sup>4</sup> Shandong Yuwang Ecological Food Industry Co., Ltd., Yucheng 251200, China

\* Correspondence: yelei@jnu.edu.cn; Tel.: +86-20-85220217

Table S1. *Bacillus. licheniformis* MLST primer information [53]

| Gene         | Primer          | Sequence(5'to3')            | Annealing temperature (°C) | Amplicon size (bp) |
|--------------|-----------------|-----------------------------|----------------------------|--------------------|
| <i>adk</i>   | <i>adk</i> -F   | GGT AAA GGG ACA CAG GCT GA  | 58                         | 465                |
|              | <i>adk</i> -R   | TCG AGT AAA GGC TGG GTT TG  |                            |                    |
| <i>ccpA</i>  | <i>ccpA</i> -F  | TAT GAT GTA GCA CGC GAA GC  | 58                         | 561                |
|              | <i>ccpA</i> -R  | TAT CCC CAA GCG CTC TTT TA  |                            |                    |
| <i>recF</i>  | <i>recF</i> -F  | ACG GTT CTG TTC CCA TTC AG  | 58                         | 561                |
|              | <i>recF</i> -R  | CAT CAC GGC CAT TGA CAT AG  |                            |                    |
| <i>rpoB</i>  | <i>rpoB</i> -F  | AGG TCA ACT AGT TCA GTA TGG | 58                         | 495                |
|              |                 | ACG                         |                            |                    |
|              | <i>rpoB</i> -R  | AAG AAC CGT AAC CGG CAA CTT |                            |                    |
| <i>spo0A</i> | <i>spo0A</i> -F | GAA GTG CTT GGT GTC GCA TA  | 58                         | 558                |
|              | <i>spo0A</i> -R | TGT GTA GCC GAA AAG TGA CG  |                            |                    |
| <i>sucC</i>  | <i>sucC</i> -F  | GGG TCC CGA CGG CCA ACA AA  | 58                         | 549                |
|              | <i>sucC</i> -R  | GGC CGG TTC CCC TCC GTA GT  |                            |                    |

Table S2. 16sRNA results of some drug-resistant bacteria

| Species                     | Sample site |        |          |          | Total |
|-----------------------------|-------------|--------|----------|----------|-------|
|                             | Guangdong   | Fujian | Jjiangsu | Shandong |       |
| <i>Bacillus</i> spp.        | 83          | 92     | 12       | 18       | 205   |
| <i>Enterobacter</i> spp.    | 13          | 7      | 0        | 0        | 20    |
| <i>Staphylococcus</i> spp.  | 4           | 15     | 0        | 1        | 20    |
| <i>Aeromonas</i> spp.       | 9           | 7      | 4        | 0        | 20    |
| <i>Rothia amarae</i>        | 0           | 0      | 2        | 0        | 2     |
| <i>Lactococcus garvieae</i> | 0           | 9      | 5        | 0        | 14    |
| <i>Vagococcus</i> sp.       | 1           | 0      | 0        | 5        | 6     |
| <i>Arthrobacter</i> sp.     | 0           | 0      | 0        | 1        | 1     |
| <i>Proteus</i>              | 6           | 2      | 0        | 0        | 8     |
| Other genera                | 8           | 36     | 0        | 1        | 45    |

Table S3. Antibiotic resistance spectra of all tested antibiotics for the 202 tested isolates

| Name         | Isolation source | Region          | Antibiotic resistance spectra              | MDR Index |
|--------------|------------------|-----------------|--------------------------------------------|-----------|
| shui14       | pond water       | China-Shandong  | SXT,CTR,FEP,IPM,CIP,AM,CF,GM, MEM,TE,FOS,C | 1         |
| GD-23-T      | soil             | China-Guangdong | IPM,AM,GM,FEP,CTR,TE,SXT,CF,C              | 0.75      |
| BS4          | pond water       | China-Fujian    | CTR,AM,FEP,SXT,IPM,FOS,CF,C                | 0.67      |
| BS12         | aquafeed         | China-Fujian    | CTR,AM,FEP,SXT,IPM,FOS,CF,C                | 0.67      |
| BS13         | aquafeed         | China-Fujian    | CTR,AM,FEP,SXT,IPM,FOS,CF,C                | 0.67      |
| BS40         | aquafeed         | China-Fujian    | CTR,TE,FEP,SXT,IPM,FOS,CF,C                | 0.67      |
| GD-HY-S-1-26 | pond water       | China-Guangdong | IPM,MEM,FOS,AM,GM,SXT,C                    | 0.58      |
| GD-GWCS28    | pond water       | China-Guangdong | IPM,AM,FEP,CTR,TE,SXT,CF,C                 | 0.67      |
| B-S-6        | pond water       | China-Guangdong | IPM,MEM,FOS,AM,CTR,TE,CF,C                 | 0.67      |
| BS38         | aquafeed         | China-Fujian    | CTR,AM,FEP,SXT,FOS,CF,C                    | 0.58      |
| BS45         | aquafeed         | China-Fujian    | CTR,AM,FEP,SXT,FOS,CF,C                    | 0.58      |
| tx2-8        | shrimp           | China-Fujian    | CTR,AM,FEP,SXT,FOS,CF,C                    | 0.58      |
| tS41         | pond water       | China-Fujian    | CTR,AM,FEP,SXT,FOS,CF,C                    | 0.58      |
| BS48         | aquafeed         | China-Fujian    | CTR,TE,FEP,SXT,CF,FOS,C                    | 0.58      |
| TS47         | pond water       | China-Fujian    | CTR,TE,FEP,AM,CF,FOS,C                     | 0.58      |
| tt30         | soil             | China-Fujian    | CTR,TE,FEP,SXT,CF,IPM,C                    | 0.58      |
| tx1-18       | shrimp           | China-Fujian    | CTR,AM,FEP,SXT,IPM,CF,C                    | 0.58      |
| tx2-51       | shrimp           | China-Fujian    | CTR,AM,FEP,SXT,IPM,CF,C                    | 0.58      |
| tx2-44       | shrimp           | China-Fujian    | CTR,TE,AM,FEP,SXT,CF,C                     | 0.58      |
| GD-15-T      | soil             | China-Guangdong | AM,FEP,CTR,TE,SXT,CF,C                     | 0.58      |

|          |            |                 |                        |      |
|----------|------------|-----------------|------------------------|------|
| GD-S-9   | aquafeed   | China-Guangdong | AM,FEP,CTR,TE,SXT,CF,C | 0.58 |
| GD-SL-20 | aquafeed   | China-Guangdong | AM,FEP,CTR,TE,SXT,CF,C | 0.58 |
| GD-37-T  | soil       | China-Guangdong | IPM,AM,FEP,CTR,SXT,C   | 0.5  |
| GWCS23   | pond water | China-Guangdong | FOS,CTR,AM,TE,FEP,C    | 0.5  |
| BS39     | aquafeed   | China-Fujian    | CTR,TE,AM,SXT,CF,C     | 0.5  |
| TS58     | pond water | China-Fujian    | TE,AM,CIP,FOS,CF,C     | 0.5  |
| tx1-54   | shrimp     | China-Fujian    | CTR,FEP,SXT,IPM,CF,C   | 0.5  |
| tx2-16   | shrimp     | China-Fujian    | CTR,AM,SXT,IPM,CF,C    | 0.5  |
| tx2-30   | shrimp     | China-Fujian    | CTR,FEP,SXT,MEM,CF,C   | 0.5  |
| tS42     | pond water | China-Fujian    | CTR,AM,FEP,SXT,CF,C    | 0.5  |
| tt12     | shrimp     | China-Fujian    | CTR,AM,FEP,SXT,CF,C    | 0.5  |
| tx1-1    | shrimp     | China-Fujian    | CTR,AM,FEP,SXT,CF,C    | 0.5  |
| tx1-2    | shrimp     | China-Fujian    | CTR,AM,FEP,SXT,CF,C    | 0.5  |
| tx1-3    | shrimp     | China-Fujian    | CTR,AM,FEP,SXT,CF,C    | 0.5  |
| tx1-4    | shrimp     | China-Fujian    | CTR,AM,FEP,SXT,CF,C    | 0.5  |
| tx1-15   | shrimp     | China-Fujian    | CTR,AM,FEP,SXT,CF,C    | 0.5  |
| tx1-16   | shrimp     | China-Fujian    | CTR,AM,FEP,SXT,CF,C    | 0.5  |
| tx1-17   | shrimp     | China-Fujian    | CTR,AM,FEP,SXT,CF,C    | 0.5  |
| tx1-20   | shrimp     | China-Fujian    | CTR,AM,FEP,SXT,CF,C    | 0.5  |
| tx1-21   | shrimp     | China-Fujian    | CTR,AM,FEP,SXT,CF,C    | 0.5  |
| tx1-22   | shrimp     | China-Fujian    | CTR,AM,FEP,SXT,CF,C    | 0.5  |
| tx1-24   | shrimp     | China-Fujian    | CTR,AM,FEP,SXT,CF,C    | 0.5  |

|          |          |                 |                        |      |
|----------|----------|-----------------|------------------------|------|
| tx1-25   | shrimp   | China-Fujian    | CTR,AM,FEP,SXT,CF,C    | 0.5  |
| tx1-28   | shrimp   | China-Fujian    | CTR,AM,FEP,SXT,CF,C    | 0.5  |
| tx1-32   | shrimp   | China-Fujian    | CTR,AM,FEP,SXT,CF,C    | 0.5  |
| tx1-36   | shrimp   | China-Fujian    | CTR,AM,FEP,SXT,CF,C    | 0.5  |
| tx1-37   | shrimp   | China-Fujian    | CTR,AM,FEP,SXT,CF,C    | 0.5  |
| tx1-44   | shrimp   | China-Fujian    | CTR,AM,FEP,SXT,CF,C    | 0.5  |
| tx1-51   | shrimp   | China-Fujian    | CTR,AM,FEP,SXT,CF,C    | 0.5  |
| tx2-7    | shrimp   | China-Fujian    | CTR,AM,FEP,SXT,CF,C    | 0.5  |
| tx2-9    | shrimp   | China-Fujian    | CTR,AM,FEP,SXT,CF,C    | 0.5  |
| tx2-10   | shrimp   | China-Fujian    | CTR,AM,FEP,SXT,CF,C    | 0.5  |
| tx2-11   | shrimp   | China-Fujian    | CTR,AM,FEP,SXT,CF,C    | 0.5  |
| tx2-22   | shrimp   | China-Fujian    | CTR,AM,FEP,SXT,CF,C    | 0.5  |
| tx2-25   | shrimp   | China-Fujian    | CTR,AM,FEP,SXT,CF,C    | 0.5  |
| tx2-26   | shrimp   | China-Fujian    | CTR,AM,FEP,SXT,CF,C    | 0.5  |
| tx2-31   | shrimp   | China-Fujian    | CTR,AM,FEP,SXT,CF,C    | 0.5  |
| tx2-33   | shrimp   | China-Fujian    | CTR,AM,FEP,SXT,CF,C    | 0.5  |
| tx2-39   | shrimp   | China-Fujian    | CTR,AM,FEP,SXT,CF,C    | 0.5  |
| tx2-54   | shrimp   | China-Fujian    | CTR,AM,FEP,SXT,CF,C    | 0.5  |
| GD-3-T   | soil     | China-Guangdong | AM,FEP,CTR,TE,SXT,CF,C | 0.58 |
| JS-YHS52 | aquafeed | China-Jiangsu   | CTR,AM,FEP,CF,FOS,C    | 0.5  |
| JS-YHS57 | aquafeed | China-Jiangsu   | CTR,AM,FEP,CF,FOS,C    | 0.5  |
| TWS5     | aquafeed | China-Jiangsu   | CTR,TE,FEP,CF,FOS,C    | 0.5  |

|           |            |                 |                     |      |
|-----------|------------|-----------------|---------------------|------|
| JS-TWS15  | aquafeed   | China-Jiangsu   | CTR,AM,FEP,CF,FOS,C | 0.5  |
| GD-20-T   | soil       | China-Guangdong | IPM,FEP,CTR,SXT,C   | 0.42 |
| GD-T-1    | soil       | China-Guangdong | AM,FEP,CTR,SXT,CF,C | 0.5  |
| GD-SL-16  | aquafeed   | China-Guangdong | AM,FEP,CTR,SXT,CF,C | 0.5  |
| GD-41-T   | soil       | China-Guangdong | AM,SXT,FEP,CTR,C    | 0.42 |
| GD-28-T   | soil       | China-Guangdong | AM,SXT,FEP,CTR,C    | 0.42 |
| GWCS29    | pond water | China-Guangdong | FOS,FEP,CTR,TE,C    | 0.42 |
| GWCS33    | pond water | China-Guangdong | FOS,FEP,CTR,TE,C    | 0.42 |
| GWCS49    | pond water | China-Guangdong | FOS,FEP,CTR,TE,C    | 0.42 |
| GWCS16    | pond water | China-Guangdong | FOS,FEP,CTR,TE,C    | 0.42 |
| GWCS17    | pond water | China-Guangdong | FOS,FEP,CTR,TE,C    | 0.42 |
| GD-GWCT10 | soil       | China-Guangdong | FOS,FEP,CTR,TE,C    | 0.42 |
| GD-50-T   | soil       | China-Guangdong | AM,FEP,CTR,SXT,C    | 0.42 |
| TS56      | pond water | China-Fujian    | CTR,AM,FEP,FOS,C    | 0.42 |
| TS40      | pond water | China-Fujian    | TE,AM,FOS,CF,C      | 0.42 |
| tt36      | soil       | China-Fujian    | TE,SXT,IPM,FOS,C    | 0.42 |
| tt55      | soil       | China-Fujian    | AM,FEP,SXT,FOS,C    | 0.42 |
| tx1-49    | shrimp     | China-Fujian    | AM,FEP,SXT,CF,C     | 0.42 |
| tx2-36    | shrimp     | China-Fujian    | AM,FEP,SXT,CF,C     | 0.42 |
| tt7       | soil       | China-Fujian    | SXT,IPM,MEM,FOS,C   | 0.42 |
| tS18      | pond water | China-Fujian    | CTR,FEP,SXT,CF,C    | 0.42 |
| tx1-23    | shrimp     | China-Fujian    | CTR,FEP,SXT,CF,C    | 0.42 |

|              |            |                 |                  |      |
|--------------|------------|-----------------|------------------|------|
| tx2-6        | shrimp     | China-Fujian    | CTR,FEP,SXT,CF,C | 0.42 |
| tx2-15       | shrimp     | China-Fujian    | CTR,FEP,SXT,CF,C | 0.42 |
| tx2-21       | shrimp     | China-Fujian    | CTR,FEP,SXT,CF,C | 0.42 |
| SD-S20       | pond water | China-Shandong  | CTR,FEP,CF,FOS,C | 0.42 |
| GD-T-24      | soil       | China-Guangdong | AM,CTR,SXT,C     | 0.33 |
| GD-T-33      | soil       | China-Guangdong | FEP,CTR,SXT,C    | 0.33 |
| B-10-X-3     | shrimp     | China-Guangdong | FEP,CTR,SXT,C    | 0.33 |
| GWCS14       | pond water | China-Guangdong | FOS,AM,TE,C      | 0.33 |
| GD-2-T       | soil       | China-Guangdong | FEP,CTR,SXT,C    | 0.33 |
| GD-TS11      | aquafeed   | China-Guangdong | AM,FEP,CTR,C     | 0.33 |
| GD-HY-33-T   | soil       | China-Guangdong | AM,GM,TE,C       | 0.33 |
| GWCS47       | pond water | China-Guangdong | FOS,FEP,TE,C     | 0.33 |
| GWCS41       | pond water | China-Guangdong | FEP,CTR,TE,C     | 0.33 |
| GD-GWC10X-11 | shrimp     | China-Guangdong | AM,CTR,TE,C      | 0.33 |
| B-5-X-11     | shrimp     | China-Guangdong | FOS,FEP,CTR,C    | 0.33 |
| GWC9X-9      | shrimp     | China-Guangdong | FOS,CTR,TE,C     | 0.33 |
| B-X-25-44    | shrimp     | China-Guangdong | IPM,MEM,AM,C     | 0.33 |
| GD-HY-26-T   | soil       | China-Guangdong | FEP,CTR,SXT,C    | 0.33 |
| GD-HY-54-T   | soil       | China-Guangdong | FEP,CTR,SXT,C    | 0.33 |
| BS60         | aquafeed   | China-Fujian    | FEP,SXT,CF,C     | 0.33 |
| TS50         | pond water | China-Fujian    | FEP,CTR,CF,C     | 0.33 |

|            |               |                     |               |      |
|------------|---------------|---------------------|---------------|------|
| Ts20       | pond<br>water | China-<br>Fujian    | FEP,CTR,CF,C  | 0.33 |
| TS53       | pond<br>water | China-<br>Fujian    | FOS,CTR,CF,C  | 0.33 |
| TS31       | pond<br>water | China-<br>Fujian    | FOS,FEP,CF,C  | 0.33 |
| TS37       | pond<br>water | China-<br>Fujian    | CTR,TE,AM,C   | 0.33 |
| tt13       | soil          | China-<br>Fujian    | TE,AM,CF,C    | 0.33 |
| tt3        | soil          | China-<br>Fujian    | TE,FOS,CF,C   | 0.33 |
| tx1-45     | shrimp        | China-<br>Fujian    | CTR,AM,CF,C   | 0.33 |
| JS-YHS25   | aquafeed      | China-<br>Jiangsu   | FEP,CF,FOS,C  | 0.33 |
| 0.5s29     | aquafeed      | China-<br>Shandong  | AM,TE,FOS,C   | 0.33 |
| 0.5s40     | aquafeed      | China-<br>Shandong  | AM,TE,FOS,C   | 0.33 |
| 0.5s45     | aquafeed      | China-<br>Shandong  | AM,TE,FOS,C   | 0.33 |
| tu31       | soil          | China-<br>Shandong  | AM,TE,FOS,C   | 0.33 |
| tu50       | soil          | China-<br>Shandong  | CTR,FEP,FOS,C | 0.33 |
| 2x20       | shrimp        | China-<br>Shandong  | AM,TE,FOS,C   | 0.33 |
| GD-HY-T-14 | soil          | China-<br>Guangdong | FEP,CTR,C     | 0.25 |
| GD-HY-T-19 | soil          | China-<br>Guangdong | FEP,FOS,C     | 0.25 |
| GWCS4      | pond<br>water | China-<br>Guangdong | FOS,FEP,C     | 0.25 |
| GD-SL-21   | aquafeed      | China-<br>Guangdong | AM,FEP,C      | 0.25 |
| GWCS26     | pond<br>water | China-<br>Guangdong | MEM,FOS,C     | 0.25 |
| GD-GWC5X-4 | shrimp        | China-<br>Guangdong | CIP,AM,C      | 0.25 |
| GWC10X-1   | shrimp        | China-<br>Guangdong | FEP,CTR,C     | 0.25 |
| GWCS12     | pond<br>water | China-<br>Guangdong | FOS,TE,C      | 0.25 |



|                |               |                     |           |      |
|----------------|---------------|---------------------|-----------|------|
| GWCS9          | pond<br>water | China-<br>Guangdong | FOS,FEP,C | 0.25 |
| GD-<br>GWCT11  | soil          | China-<br>Guangdong | MEM,FEP,C | 0.25 |
| GWCT18         | soil          | China-<br>Guangdong | FEP,TE,C  | 0.25 |
| B-2-T-11       | soil          | China-<br>Guangdong | FEP,MEM,C | 0.25 |
| GD-HY-53-<br>T | soil          | China-<br>Guangdong | FEP,CTR,C | 0.25 |
| TS2            | pond<br>water | China-<br>Fujian    | CTR,CF,C  | 0.25 |
| TS35           | pond<br>water | China-<br>Fujian    | CTR,CF,C  | 0.25 |
| TS36           | pond<br>water | China-<br>Fujian    | FOS,CF,C  | 0.25 |
| tS16           | pond<br>water | China-<br>Fujian    | CTR,TE,C  | 0.25 |
| ts55           | soil          | China-<br>Fujian    | CTR,TE,C  | 0.25 |
| tt17           | soil          | China-<br>Fujian    | CTR,FEP,C | 0.25 |
| tS48           | pond<br>water | China-<br>Fujian    | TE,FOS,C  | 0.25 |
| tS10           | pond<br>water | China-<br>Fujian    | TE,FOS,C  | 0.25 |
| ts25           | aquafeed      | China-<br>Fujian    | TE,CF,C   | 0.25 |
| TS38           | pond<br>water | China-<br>Fujian    | AM,FOS,C  | 0.25 |
| tt28           | soil          | China-<br>Fujian    | AM,FOS,C  | 0.25 |
| HYS3-16        | aquafeed      | China-<br>Guangdong | FEP,C     | 0.17 |
| GD-HY-T-<br>16 | soil          | China-<br>Guangdong | FEP,C     | 0.17 |
| GD-HY-T-<br>40 | soil          | China-<br>Guangdong | FEP,C     | 0.17 |
| GD-SL-1-3      | aquafeed      | China-<br>Guangdong | TE,C      | 0.17 |
| GWC9X-8        | shrimp        | China-<br>Guangdong | FOS,C     | 0.17 |
| GWCS1          | pond<br>water | China-<br>Guangdong | CTR,C     | 0.17 |

|                |               |                     |       |      |
|----------------|---------------|---------------------|-------|------|
| GWCS2          | pond<br>water | China-<br>Guangdong | SXT,C | 0.17 |
| GWCT22         | soil          | China-<br>Guangdong | FOS,C | 0.17 |
| GWCT17         | soil          | China-<br>Guangdong | FOS,C | 0.17 |
| B-T-9          | soil          | China-<br>Guangdong | TE,C  | 0.17 |
| GD-HY-24-<br>T | soil          | China-<br>Guangdong | FOS,C | 0.17 |
| GD-4-X-16      | shrimp        | China-<br>Guangdong | FEP,C | 0.17 |
| GD-28-S        | pond<br>water | China-<br>Guangdong | FEP,C | 0.17 |
| B-S-31         | pond<br>water | China-<br>Guangdong | TE,C  | 0.17 |
| GWCS39         | pond<br>water | China-<br>Guangdong | CTR,C | 0.17 |
| GWCS43         | pond<br>water | China-<br>Guangdong | FOS,C | 0.17 |
| GWCS5X-3       | shrimp        | China-<br>Guangdong | FOS,C | 0.17 |
| B-10-X-5       | shrimp        | China-<br>Guangdong | TE,C  | 0.17 |
| B-9-X-6        | shrimp        | China-<br>Guangdong | TE,C  | 0.17 |
| GWCS5          | pond<br>water | China-<br>Guangdong | CTR,C | 0.17 |
| B-T-1          | soil          | China-<br>Guangdong | TE,C  | 0.17 |
| B-SL-F-33      | aquafeed      | China-<br>Guangdong | TE,C  | 0.17 |
| B-SL-F-44      | aquafeed      | China-<br>Guangdong | TE,C  | 0.17 |
| tS21           | pond<br>water | China-<br>Fujian    | FOS,C | 0.17 |
| tS19           | pond<br>water | China-<br>Fujian    | TE,C  | 0.17 |
| tS23           | pond<br>water | China-<br>Fujian    | TE,C  | 0.17 |
| tt9            | soil          | China-<br>Fujian    | TE,C  | 0.17 |
| tS54           | pond<br>water | China-<br>Fujian    | TE,C  | 0.17 |

|           |               |                     |       |      |
|-----------|---------------|---------------------|-------|------|
| tS44      | pond<br>water | China-<br>Fujian    | AM,C  | 0.17 |
| ts32      | aquafeed      | China-<br>Fujian    | GM,C  | 0.17 |
| ts33      | aquafeed      | China-<br>Fujian    | CTR,C | 0.17 |
| TWS11     | aquafeed      | China-<br>Jiangsu   | FOS,C | 0.17 |
| TWS19     | aquafeed      | China-<br>Jiangsu   | AM,C  | 0.17 |
| 0.5s35    | aquafeed      | China-<br>Shandong  | TE,C  | 0.17 |
| 1s2       | aquafeed      | China-<br>Shandong  | FOS,C | 0.17 |
| 1s15      | aquafeed      | China-<br>Shandong  | FOS,C | 0.17 |
| shui11    | pond<br>water | China-<br>Shandong  | FOS,C | 0.17 |
| SD-S12    | pond<br>water | China-<br>Shandong  | CF,C  | 0.17 |
| shui30    | pond<br>water | China-<br>Shandong  | FOS,C | 0.17 |
| SD-S36    | pond<br>water | China-<br>Shandong  | CTR,C | 0.17 |
| 2x37      | shrimp        | China-<br>Shandong  | TE,C  | 0.17 |
| 2x48      | shrimp        | China-<br>Shandong  | TE,C  | 0.17 |
| 2x56      | shrimp        | China-<br>Shandong  | TE,C  | 0.17 |
| B-SL-F-8  | aquafeed      | China-<br>Guangdong | C     | 0.08 |
| B-S-19    | pond<br>water | China-<br>Guangdong | C     | 0.08 |
| B-S-8     | pond<br>water | China-<br>Guangdong | C     | 0.08 |
| GWC2X-5   | shrimp        | China-<br>Guangdong | C     | 0.08 |
| GWCS18    | pond<br>water | China-<br>Guangdong | C     | 0.08 |
| GD-SL-42  | aquafeed      | China-<br>Guangdong | C     | 0.08 |
| B-SL-F-25 | aquafeed      | China-<br>Guangdong | C     | 0.08 |

|       |          |               |   |      |
|-------|----------|---------------|---|------|
| BS2   | aquafeed | China-Fujian  | C | 0.08 |
| tt45  | soil     | China-Fujian  | C | 0.08 |
| YHS2  | aquafeed | China-Jiangsu | C | 0.08 |
| YHS3  | aquafeed | China-Jiangsu | C | 0.08 |
| YHS4  | aquafeed | China-Jiangsu | C | 0.08 |
| YHS19 | aquafeed | China-Jiangsu | C | 0.08 |
| TWS9  | aquafeed | China-Jiangsu | C | 0.08 |

Table S4. *B. licheniformis* genomes were recovered from the GenBank database

| Name            | Isolation source            | Region                     | ST |
|-----------------|-----------------------------|----------------------------|----|
| GCF_001587315.1 | Mushroom soup               | Netherlands                | 3  |
| GCF_015845325.1 | unknown                     | USA                        | 1  |
| GCF_000008425.1 | unknown                     | unknown                    | 1  |
| GCF_000011645.1 | unknown                     | unknown                    | 1  |
| GCF_018332815.1 | Honey                       | Japan                      | 1  |
| GCF_018332835.1 | Honey                       | Japan                      | 1  |
| GCF_016026835.1 | unknown                     | unknown                    | 3  |
| GCF_016126875.1 | chicken                     | China:Chengdu              | 3  |
| GCF_020686805.1 | leaf                        | Tunisia:Bulla-Regia        | 3  |
| GCF_020686825.1 | leaf                        | Tunisia:Bulla-Regia        | 3  |
| GCF_020686845.1 | leaf                        | Tunisia:Bulla-Regia        | 3  |
| GCF_021045125.1 | goat                        | South Africa               | 3  |
| GCF_002272455.1 | uncut heroin sample         | Germany                    | 3  |
| GCF_002272365.1 | uncut heroin sample         | Germany                    | 3  |
| GCF_003474315.1 | feces                       | China: Shenzhen            | 3  |
| GCF_001642595.1 | soil                        | Czech Republic:Nerartovice | 3  |
| GCF_003253815.1 | adult feces                 | South Korea: Bundang       | 3  |
| GCF_003606405.1 | Maotai Daqu                 | China                      | 3  |
| GCF_003952865.1 | Korean adult feces          | South Korea: Seoul         | 3  |
| GCF_006974025.1 | unknown                     | unknown                    | 3  |
| GCF_002966955.1 | High-salt fermented soybean | South Korea: Suwon         | 3  |
| GCF_004103575.1 | food                        | South Korea                | 3  |
| GCF_007831015.1 | human feces                 | Netherlands                | 3  |
| GCF_001925055.1 | unknown                     | Netherlands                | 3  |
| GCF_002271465.1 | uncut heroin sample         | Germany                    | 3  |
| GCF_007830775.1 | cheese                      | Netherlands                | 3  |
| GCF_007830795.1 | seawater                    | Netherlands                | 3  |

|                 |                                                                                               |                       |   |
|-----------------|-----------------------------------------------------------------------------------------------|-----------------------|---|
| GCF_007831035.1 | human feces                                                                                   | Netherlands           | 3 |
| GCF_007831215.1 | air sampler                                                                                   | Netherlands           | 3 |
| GCF_007831435.1 | Pig faeces                                                                                    | Germany               | 1 |
| GCF_007831465.1 | Pig faeces                                                                                    | Germany               | 3 |
| GCF_007831495.1 | soil                                                                                          | Netherlands           | 3 |
| GCF_007831515.1 | Pig faeces Germany, Farm, Slaughterpigs; not receiving antibiotics or Bacillus based products | Germany               | 3 |
| GCF_007831575.1 | soil                                                                                          | Denmark: Vigerslev    | 3 |
| GCF_007831655.1 | soil                                                                                          | Denmark: Vigerslev    | 1 |
| GCF_007831695.1 | soil                                                                                          | Denmark: Vigerslev    | 3 |
| GCF_007831705.1 | soil                                                                                          | Denmark: Vigerslev    | 3 |
| GCF_007831875.1 | Pig faeces Germany, Farm, Slaughterpigs; not receiving antibiotics or Bacillus based products | Germany               | 3 |
| GCF_007832095.1 | swine faeces                                                                                  | Germany               | 3 |
| GCF_007832135.1 | swine faeces                                                                                  | Germany               | 1 |
| GCF_007832235.1 | aborted bovine fetus, lung                                                                    | Netherlands           | 3 |
| GCF_007832295.1 | potato pulp for cattle feeding                                                                | Netherlands           | 3 |
| GCF_007832395.1 | aborted bovine, placenta                                                                      | Netherlands           | 3 |
| GCF_008368515.1 | Gergoush (Sudanese Bread snack) primary fermentation step                                     | Sudan                 | 3 |
| GCF_009662395.1 | soil in grass field, non-agriculture site                                                     | Denmark:Dyrehave      | 3 |
| GCF_009965255.1 | soil                                                                                          | Canada                | 3 |
| GCF_007832345.1 | aborted bovine fetus, lung                                                                    | Denmark               | 3 |
| GCF_010578005.1 | commercial probiotic used for environment                                                     | China                 | 1 |
| GCF_014673515.1 | Crude salt from Camalti Saltern                                                               | Turkey: Izmir         | 1 |
| GCF_020686785.1 | plant leaf                                                                                    | Tunisia: Bulla-Regia  | 3 |
| GCF_023713085.1 | Cleanroom                                                                                     | USA                   | 3 |
| GCF_023713165.1 | Cleanroom                                                                                     | USA                   | 3 |
| GCF_023714845.1 | Cleanroom                                                                                     | USA                   | 3 |
| GCF_001587355.1 | dairy environment                                                                             | Netherlands           | 3 |
| GCF_000315975.1 | Chinese Maotai-flavor liquor making process                                                   | China: Jiangsu        | 3 |
| GCF_002272395.1 | uncut heroin sample                                                                           | Germany               | 3 |
| GCF_000258125.2 | soil from Yingcheng Salt Mine                                                                 | China: Hubei Province | 3 |

|                 |                                                                 |                         |   |
|-----------------|-----------------------------------------------------------------|-------------------------|---|
| GCF_001507755.1 | unknown                                                         | Netherlands             | 4 |
| GCF_016629635.1 | mining drainage                                                 | Peru: Lima              | 3 |
| GCF_016902155.1 | Gallusgallus' caecum                                            | unknown                 | 1 |
| GCF_007832035.1 | unknown                                                         | unknown                 | 1 |
| GCF_007994365.1 | unknown                                                         | unknown                 | 1 |
| GCF_006094335.1 | unknown                                                         | unknown                 | 1 |
| GCF_006494795.1 | silt                                                            | China: Qinghai Province | 3 |
| GCF_900110715.1 | unknown                                                         | unknown                 | 3 |
| GCF_007994305.1 | swine faeces                                                    | Germany                 | 3 |
| GCF_007994355.1 | unknown                                                         | Netherlands             | 1 |
| GCF_008368415.1 | Gergoush (Sudanese Bread<br>snack) primary fermentation<br>step | Sudan                   | 3 |
| GCF_008368425.1 | Gergoush (Sudanese Bread<br>snack) primary fermentation<br>step | Sudan                   | 3 |
| GCF_902386215.1 | Human gut                                                       | unknown                 | 3 |
| GCF_021045185.1 | horse                                                           | South Africa            | 3 |
| GCF_022630555.1 | biocompost                                                      | Germany                 | 3 |
| GCF_022700915.1 | unknown                                                         | China:Beijing           | 1 |

---

Table S5. Antibiotic resistance genes, pathogenicity score, virulence factors and mobile genetic elements of *Bacillus licheniformis*

| Isolate     | Resistance gene             | Pathogenicity Score (no. of pathogenic family) | Virulence factors                               | Mobile genetic elements                                                                |
|-------------|-----------------------------|------------------------------------------------|-------------------------------------------------|----------------------------------------------------------------------------------------|
| FJ-ts47     | ErmD, BcIII, qacJ, bcrA/B/C | 0.79 (59)                                      | fliP, clpE, invA, cesA, ureB, mxiA, flhA        | IS1182, IS3(IS150), IS1595(ISPna2), ISL3, IS5, ISNCY(ISDol1)                           |
| FJ-ts50     | qacJ, ErmD, BcIII           | 0.808(266)                                     | dhbF, clpP, lap, entB, lepA                     | IS1182, IS1595( ISPna2), IS3( IS150), IS1595( ISNha5)                                  |
| FJ-ts53     | qacJ, ErmD, BcIII           | 0.808(266)                                     | dhbF, clpP, lap, entB, lepA                     | IS1182, IS1595( ISPna2), IS3(IS150), IS1595( ISNha5), ISAs1                            |
| FJ-ts58     | qacJ, ErmD, BcIII, bcrA/B/C | 0.79 (59)                                      | fliP, clpE, invA, cesA, ureB, mxiA, flhA        | IS1182, IS1595(ISPna2), IS3(IS150), IS3(IS3), ISL3, IS5(IS5)                           |
| GD-GWCS28   | ErmD, BcIII, qacJ, bcrA/B/C | 0.81(62)                                       | dhbF, clpP, lap, capB, pvdI, Cj1440c, icl, dhbE | IS1182, IS3(IS150), IS1595(ISPna2), IS1595(IS1595)ISL3, IS110                          |
| GD-GWC10X-1 | ErmD, BcIII, qacJ           | 0.803(246)                                     | fliP, invA, cpsA, flhB                          | IS1182, IS3(IS150), IS1595(ISPna2), IS3(IS3), IS630, IS256, ISAs1, ISNCY, IS110, IS4   |
| GD-GWCT1    | qacJ, ErmD, BcIII, bcrB/C   | 0.81(62)                                       | dhbF, capB, pvdI, dhbE, pchD                    | IS1182, IS1595(ISPna2), IS3(IS150), ISL3, IS110, IS66, IS5(ISL2), IS1595(IS1595) , Tn3 |
| GD-TS11     | qacJ, BcIII                 | 0.807(230)                                     | fliP, invA, cpsA, flhB, narH                    | IS1182, IS1595( ISPna2), IS3( IS150)                                                   |
| GD-GWC5X-4  | qacJ, ErmD, BcIII           | 0.808(269)                                     | fliP, clpE, invA, cpsA, flhB, lplA1             | IS1182, IS1595( ISPna2) , IS3(IS150), IS1595(ISNha5), ISAs1                            |
| GD-GWCT10   | qacJ, ErmD, BcIII, bcrA/B/C | 0.81 (62)                                      | dhbF, clpP, lap, capB, pvdI, Cj1440c, icl, dhbE | IS1182, IS1595(ISPna2), IS3( IS150), ISL3, IS1182, IS110, IS1595, Tn3                  |
| JS-TWS15    | qacJ, ErmD, BcIII           | 0.808(227)                                     | clpE, lplA1                                     | IS1182, IS1595( ISPna2), IS3(IS150)                                                    |
| JS-YHS25    | ErmD, BcIII, qacJ           | 0.808(266)                                     | dhbF, clpP, lap, entB, lepA                     | IS1182, IS3(IS150), IS1595(ISPna2), IS1595(ISNha5) , ISAs1                             |
| JS-YHS52    | qacJ, ErmD, BcIII           | 0.808(265)                                     | dhbF, clpP, lap, entB, lepA                     | IS1182, IS1595( ISPna2), IS3(IS150), IS1595( ISNha5), ISAs1                            |
| JS-YHS57    | qacJ, ErmD, BcIII           | 0.808(267)                                     | dhbF, clpP, lap, entB, lepA                     | IS1182, IS1595( ISPna2), IS3(IS150), IS1595( ISNha5), ISAs1                            |
| SD-S12      | qacJ, ErmD, BcIII           | 0.808(266)                                     | dhbF, clpP, lap, entB, lepA                     | IS1182, IS1595( ISPna2), IS3(IS150), IS1595( ISNha5), ISAs1                            |
| SD-S20      | ErmD, BcIII, qacJ           | 0.808(266)                                     | dhbF, clpP, lap, entB, lepA                     | IS1182, IS3(IS150), IS1595(ISPna2), IS1595(IS1595), ISL3, IS110                        |
| SD-S36      | qacJ, ErmD, BcIII           | 0.808(266)                                     | dhbF, clpP, lap, entB, lepA                     | IS1182, IS1595( ISPna2), IS3(IS150), IS1595( ISNha5)                                   |
